# Supplementary material
Source: PubMed Central journal article supplement (PMC2881817)

Supplemental Fig. 1

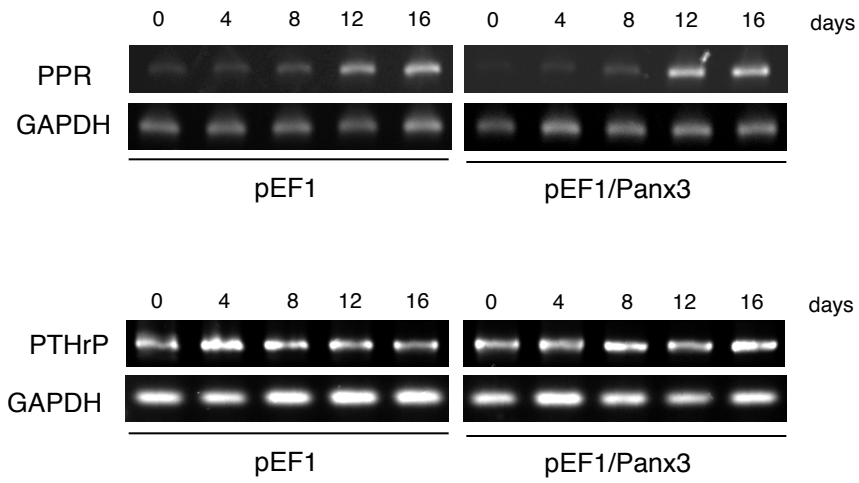

Supplement: supp_M110.127027_jbc.M110.127027-1.pdf [file supp_M110.127027_jbc.M110.127027-1.pdf]
